# Supplementary material for: Analytical figures of merit of a low-dispersion aerosol transport system for high-throughput LA-ICP-MS analysis
Source: Royal Society of Chemistry journal article supplement (doi:10.1039/d1ja00110h), 2021-01-01
Supplement: d1ja00110h1.pdf [file d1ja00110h1.pdf]

## Electronic Supplementary Information

# Analytical figures of merit of a low-dispersion aerosol transport system for high-throughput LA-ICP-MS analysis

Thibaut Van Acker,<sup>\*a</sup> Stijn J. M. Van Malderen,<sup>b</sup> Tom Van Helden,<sup>a</sup> Ciprian Stremtan,<sup>b</sup> Martin Šala,<sup>c</sup> Johannes T. van Elteren<sup>c</sup> and Frank Vanhaecke<sup>a</sup>

<sup>a</sup>*Atomic & Mass Spectrometry – A&MS Research Group, Department of Chemistry, Ghent University, Campus Sterre, Krijgslaan 281-S12, 9000 Ghent, Belgium*

<sup>b</sup>*Teledyne CETAC Technologies, 14306 Industrial Rd, Omaha, NE 68144, USA*

<sup>c</sup>*Department of Analytical Chemistry, National Institute of Chemistry, Hajdrihova 19, SI-1000 Ljubljana, Slovenia*

<sup>\*</sup>*Corresponding author, e-mail address: [Thibaut.VanAcker@UGent.be](mailto:Thibaut.VanAcker@UGent.be), phone number: +32 9 264 4851.*

### *Author contact information:*

|                          |                                                                                    |                                                                                                  |
|--------------------------|------------------------------------------------------------------------------------|--------------------------------------------------------------------------------------------------|
| Thibaut Van Acker        | <a href="mailto:Thibaut.VanAcker@UGent.be">Thibaut.VanAcker@UGent.be</a>           | ORCID: <a href="https://orcid.org/0000-0002-0649-7228">https://orcid.org/0000-0002-0649-7228</a> |
| Stijn J. M. Van Malderen | <a href="mailto:Stijn.VanMalderen@Teledyne.com">Stijn.VanMalderen@Teledyne.com</a> | ORCID: <a href="https://orcid.org/0000-0002-3879-7882">https://orcid.org/0000-0002-3879-7882</a> |
| Tom Van Helden           | <a href="mailto:Tom.VanHelden@UGent.be">Tom.VanHelden@UGent.be</a>                 | ORCID: <a href="https://orcid.org/0000-0001-8728-7849">https://orcid.org/0000-0001-8728-7849</a> |
| Ciprian Stremtan         | <a href="mailto:Ciprian.Stremtan@Teledyne.com">Ciprian.Stremtan@Teledyne.com</a>   | ORCID: <a href="https://orcid.org/0000-0002-3308-738X">https://orcid.org/0000-0002-3308-738X</a> |
| Martin Šala              | <a href="mailto:Martin.Sala@ki.si">Martin.Sala@ki.si</a>                           | ORCID: <a href="https://orcid.org/0000-0001-7845-860X">https://orcid.org/0000-0001-7845-860X</a> |
| Johannes T. van Elteren  | <a href="mailto:Elteren@ki.si">Elteren@ki.si</a>                                   | ORCID: <a href="https://orcid.org/0000-0003-2237-7821">https://orcid.org/0000-0003-2237-7821</a> |
| Frank Vanhaecke          | <a href="mailto:Frank.Vanhaecke@UGent.be">Frank.Vanhaecke@UGent.be</a>             | ORCID: <a href="https://orcid.org/0000-0002-1884-3853">https://orcid.org/0000-0002-1884-3853</a> |

## Electronic Supplementary Information

### Table of contents

#### 1. Tables

- 1.1. Table S1 – List of predicted average fluid velocities, Reynolds numbers and pressure drops for aerosol transport tubing of varying length and ID.
- 1.2. Table S2 – Instrument settings and data acquisition conditions for evaluating the influence of tubing ID, length and curvature on the analytical performance of aerosol transport systems.
- 1.3. Table S3 – Instrument settings and data acquisition conditions for evaluating the analytical performance of the ARIS and standard ATS in combination with a 2<sup>nd</sup> generation two-volume ablation cell.
- 1.4. Table S4 – Instrument settings and data acquisition conditions for evaluating the analytical performance of the ARIS across a wide range of laser beam sizes.
- 1.5. Table S5 – Instrument settings and data acquisition conditions for evaluating the analytical performance of the ARIS in combination with a 3<sup>rd</sup> generation low-dispersion ablation cell.
- 1.6. Table S6 – Instrument settings and data acquisition conditions for evaluating laser-induced elemental fractionation and oxide formation at high laser repetition rates.
- 1.7. Table S7 – Instrument settings and data acquisition conditions for evaluating the analytical performance of the ARIS and Cobalt ablation chamber across a wide range of laser repetition rates.

#### 2. Figures

- 2.1. Figure S1 – The average  $^{238}\text{U}^+/^{232}\text{Th}^+$  (black circles) and  $^{238}\text{U}^{16}\text{O}^+/^{238}\text{U}^+$  ratios (blue circles) with corresponding standard deviations obtained upon ablation of a NIST SRM 610 glass using a square spot size of 5  $\mu\text{m}$  across the full range of laser repetition rates.

## 1. Tables

### 1.1. Table S1

**Table S1.** List of predicted average fluid velocities, Reynolds numbers and pressure drops for aerosol transport tubing of varying length and ID.

| <b>Length<br/>(m)</b> | <b>ID<br/>(mm)</b> | <b>v<sub>avg</sub><br/>(m s<sup>-1</sup>)</b> | <b>Re<br/>(-)</b> | <b> ΔP <br/>(mbar)</b> |
|-----------------------|--------------------|-----------------------------------------------|-------------------|------------------------|
| 0.50                  | 0.75               | 17.2                                          | 109               | 100                    |
| 0.50                  | 1.00               | 10.3                                          | 87                | 33                     |
| 0.50                  | 2.00               | 2.6                                           | 45                | 2                      |
| 0.75                  | 0.75               | 16.5                                          | 105               | 147                    |
| 0.75                  | 1.00               | 10.1                                          | 86                | 49                     |
| 0.75                  | 2.00               | 2.6                                           | 45                | 3                      |
| 1.00                  | 0.75               | 15.9                                          | 101               | 192                    |
| 1.00                  | 1.00               | 10.0                                          | 85                | 64                     |
| 1.00                  | 2.00               | 2.6                                           | 45                | 4                      |
| 1.50                  | 0.75               | 14.8                                          | 94                | 277                    |
| 1.50                  | 1.00               | 9.7                                           | 82                | 95                     |
| 1.50                  | 2.00               | 2.6                                           | 45                | 6                      |
| 3.00                  | 0.75               | 12.6                                          | 80                | 505                    |
| 3.00                  | 1.00               | 9.0                                           | 76                | 183                    |
| 3.00                  | 2.00               | 2.6                                           | 44                | 12                     |

## 1.2. Table S2

**Table S2.** Instrument settings and data acquisition conditions for evaluating the influence of tubing ID, length and curvature on the analytical performance of aerosol transport systems.

| <b>Analyte G2 193 nm ArF*excimer-based LA-unit with HelEx-II ablation chamber</b> |                                                                            |                                                                            |                                                                                 |                                                                      |                                                                        |
|-----------------------------------------------------------------------------------|----------------------------------------------------------------------------|----------------------------------------------------------------------------|---------------------------------------------------------------------------------|----------------------------------------------------------------------|------------------------------------------------------------------------|
|                                                                                   | <b>Standard ATS<br/>PTFE tubing<br/>4 mm OD<br/>2 mm ID<br/>3 m length</b> | <b>Standard ATS<br/>PTFE tubing<br/>4 mm OD<br/>2 mm ID<br/>1 m length</b> | <b>Improved ATS<br/>PTFE tubing<br/>2 mm OD<br/>1.3 mm ID<br/>0.75 m length</b> | <b>ARIS<br/>PEEK tubing<br/>1/16" OD<br/>0.04" ID<br/>3 m length</b> | <b>ARIS<br/>PEEK tubing<br/>1/16" OD<br/>0.03" ID<br/>0.9 m length</b> |
| Laser energy density (J cm <sup>-2</sup> )                                        | 3.5                                                                        | 3.5                                                                        | 3.5                                                                             | 3.5                                                                  | 3.5                                                                    |
| Repetition rate (Hz)                                                              | 1                                                                          | 5                                                                          | 10                                                                              | 1                                                                    | 5                                                                      |
| Lateral scan speed (μm s <sup>-1</sup> )                                          | 20                                                                         | 100                                                                        | 200                                                                             | 20                                                                   | 50                                                                     |
| Beam waist diameter (μm)                                                          | 20                                                                         | 20                                                                         | 20                                                                              | 20                                                                   | 10                                                                     |
| Dosage (shots position <sup>-1</sup> )                                            | 1                                                                          | 1                                                                          | 1                                                                               | 1                                                                    | 1                                                                      |
| He carrier gas flow rate (L min <sup>-1</sup> )                                   | 0.85                                                                       | 0.65                                                                       | 0.65                                                                            | 0.49                                                                 | 0.60                                                                   |
| ICP-mass spectrometer                                                             | iCAP Q                                                                     | XSeries-II                                                                 | XSeries-II                                                                      | iCAP Q                                                               | Agilent 7900                                                           |
| RF power (W)                                                                      | 1240                                                                       | 1350                                                                       | 1350                                                                            | 1240                                                                 | 1500                                                                   |
| Ar plasma gas flow rate (L min <sup>-1</sup> )                                    | 14.0                                                                       | 13.0                                                                       | 13.0                                                                            | 14.0                                                                 | 15.0                                                                   |
| Ar auxiliary gas flow rate (L min <sup>-1</sup> )                                 | 1.00                                                                       | 0.70                                                                       | 0.70                                                                            | 1.00                                                                 | 0.90                                                                   |
| Ar make-up gas flow rate (L min <sup>-1</sup> )                                   | 0.70                                                                       | 0.69                                                                       | 0.69                                                                            | 0.70                                                                 | 1.02                                                                   |
| Acquired m/z ratio (amu)                                                          | 238                                                                        | 238                                                                        | 238                                                                             | 238                                                                  | 238                                                                    |
| Respective dwell times (ms)                                                       | 10                                                                         | 2                                                                          | 2                                                                               | 0.5                                                                  | 1                                                                      |
| Total scan cycle time (ms)                                                        | 10                                                                         | 2                                                                          | 2                                                                               | 0.5                                                                  | 1                                                                      |

## 1.3. Table S3

**Table S3.** Instrument settings and data acquisition conditions for evaluating the analytical performance of the ARIS and standard ATS in combination with a 2<sup>nd</sup> generation two-volume ablation cell.

| <b>Analyte G2 193 nm ArF*excimer-based LA-unit with HelEx-II ablation chamber</b> |                     |             |
|-----------------------------------------------------------------------------------|---------------------|-------------|
|                                                                                   | <b>Standard ATS</b> | <b>ARIS</b> |
| Laser energy density (J cm <sup>-2</sup> )                                        | 3.5                 | 3.5         |
| Repetition rate (Hz)                                                              | 1                   | 1           |
| Lateral scan speed (μm s <sup>-1</sup> )                                          | 20                  | 20          |
| Beam waist diameter (μm)                                                          | 20                  | 20          |
| Dosage (shots position <sup>-1</sup> )                                            | 1                   | 1           |
| He carrier gas flow rate (L min <sup>-1</sup> )                                   | 0.85                | 0.49        |
| <b>Thermo iCAP Q ICP-mass spectrometer</b>                                        |                     |             |
| RF power (W)                                                                      | 1240                | 1240        |
| Ar plasma gas flow rate (L min <sup>-1</sup> )                                    | 14.0                | 14.0        |
| Ar auxiliary gas flow rate (L min <sup>-1</sup> )                                 | 1.00                | 1.00        |
| Ar make-up gas flow rate (L min <sup>-1</sup> )                                   | 0.70                | 0.70        |
| Acquired m/z ratio (amu)                                                          | 238                 | 238         |
| Respective dwell times (ms)                                                       | 10                  | 0.5         |
| Total scan cycle time (ms)                                                        | 10                  | 0.5         |

## 1.4. Table S4

**Table S4.** Instrument settings and data acquisition conditions for evaluating the analytical performance of the ARIS across a wide range of laser beam sizes.

| <b>Analyte G2 193 nm ArF*excimer-based LA-unit with HelEx-II ablation chamber + ARIS</b> |        |
|------------------------------------------------------------------------------------------|--------|
| Laser energy density (J cm <sup>-2</sup> )                                               | 3.5    |
| Repetition rate (Hz)                                                                     | 1      |
| Lateral scan speed (μm s <sup>-1</sup> )                                                 | 10-110 |
| Beam waist diameter (μm)                                                                 | 10-110 |
| Dosage (shots position <sup>-1</sup> )                                                   | 1      |
| He carrier gas flow rate (L min <sup>-1</sup> )                                          | 0.6    |
| <b>Agilent 7900 ICP-mass spectrometer</b>                                                |        |
| RF power (W)                                                                             | 1500   |
| Ar plasma gas flow rate (L min <sup>-1</sup> )                                           | 15.0   |
| Ar auxiliary gas flow rate (L min <sup>-1</sup> )                                        | 0.90   |
| Ar make-up gas flow rate (L min <sup>-1</sup> )                                          | 1.00   |
| Acquired m/z ratio (amu)                                                                 | 238    |
| Respective dwell times (ms)                                                              | 4      |
| Total scan cycle time (ms)                                                               | 4      |

## 1.5. Table S5

**Table S5.** Instrument settings and data acquisition conditions for evaluating the analytical performance of the ARIS in combination with a 3<sup>rd</sup> generation low-dispersion ablation cell.

| <b>Iridia 193 nm ArF*excimer-based LA-unit with Cobalt ablation chamber + ARIS</b> |      |
|------------------------------------------------------------------------------------|------|
| Laser energy density (J cm <sup>-2</sup> )                                         | 4.0  |
| Repetition rate (Hz)                                                               | 50   |
| Lateral scan speed (μm s <sup>-1</sup> )                                           | 250  |
| Beam waist diameter (μm)                                                           | 5    |
| Dosage (shots position <sup>-1</sup> )                                             | 1    |
| He carrier gas flow rate (L min <sup>-1</sup> )                                    | 0.7  |
| <b>Agilent 7900 ICP-mass spectrometer</b>                                          |      |
| RF power (W)                                                                       | 1500 |
| Ar plasma gas flow rate (L min <sup>-1</sup> )                                     | 15.0 |
| Ar auxiliary gas flow rate (L min <sup>-1</sup> )                                  | 0.90 |
| Ar make-up gas flow rate (L min <sup>-1</sup> )                                    | 1.00 |
| Acquired m/z ratio (amu)                                                           | 238  |
| Respective dwell times (ms)                                                        | 0.1  |
| Total scan cycle time (ms)                                                         | 0.1  |

## 1.6. Table S6

**Table S6.** Instrument settings and data acquisition conditions for evaluating laser-induced elemental fractionation and oxide formation at high laser repetition rates

| <b>Iridia 193 nm ArF*excimer-based LA-unit with Cobalt ablation chamber + ARIS</b> |                                                |                                                |
|------------------------------------------------------------------------------------|------------------------------------------------|------------------------------------------------|
|                                                                                    | <b>U<sup>+</sup>/Th<sup>+</sup> evaluation</b> | <b>UO<sup>+</sup>/U<sup>+</sup> evaluation</b> |
| Laser energy density (J cm <sup>-2</sup> )                                         | 4.0                                            | 4.0                                            |
| Repetition rate (Hz)                                                               | 50-1000                                        | 50-1000                                        |
| Lateral scan speed (μm s <sup>-1</sup> )                                           | 12.5-250                                       | 12.5-250                                       |
| Beam waist diameter (μm)                                                           | 5                                              | 5                                              |
| Dosage (shots position <sup>-1</sup> )                                             | 20                                             | 20                                             |
| He carrier gas flow rate (L min <sup>-1</sup> )                                    | 0.7                                            | 0.7                                            |
| <b>Agilent 7900 ICP-mass spectrometer</b>                                          |                                                |                                                |
| RF power (W)                                                                       | 1500                                           | 1500                                           |
| Ar plasma gas flow rate (L min <sup>-1</sup> )                                     | 15.0                                           | 15.0                                           |
| Ar auxiliary gas flow rate (L min <sup>-1</sup> )                                  | 0.90                                           | 0.90                                           |
| Ar make-up gas flow rate (L min <sup>-1</sup> )                                    | 1.00                                           | 1.00                                           |
| Acquired m/z ratios (amu)                                                          | 232 & 238                                      | 238 & 254                                      |
| Respective dwell times (ms)                                                        | 98 & 98                                        | 98 & 98                                        |
| Total scan cycle time (ms)                                                         | 200                                            | 200                                            |

## 1.7. Table S7

**Table S7.** Instrument settings and data acquisition conditions for evaluating the analytical performance of the ARIS and Cobalt ablation chamber across a wide range of laser repetition rates.

| <b>Iridia 193 nm ArF*excimer-based LA-unit with Cobalt ablation chamber + ARIS</b> |                 |
|------------------------------------------------------------------------------------|-----------------|
| Laser energy density (J cm <sup>-2</sup> )                                         | 4.0             |
| Repetition rate (Hz)                                                               | 10-1000         |
| Lateral scan speed (μm s <sup>-1</sup> )                                           | 2.5-250         |
| Beam waist diameter (μm)                                                           | 5 (square mask) |
| Dosage (shots position <sup>-1</sup> )                                             | 1               |
| He carrier gas flow rate (L min <sup>-1</sup> )                                    | 0.7             |
| <b>Agilent 7900 ICP-mass spectrometer</b>                                          |                 |
| RF power (W)                                                                       | 1500            |
| Ar plasma gas flow rate (L min <sup>-1</sup> )                                     | 15.0            |
| Ar auxiliary gas flow rate (L min <sup>-1</sup> )                                  | 0.90            |
| Ar make-up gas flow rate (L min <sup>-1</sup> )                                    | 1.00            |
| Acquired m/z ratio (amu)                                                           | 238             |
| Respective dwell times (ms)                                                        | 0.1             |
| Total scan cycle time (ms)                                                         | 0.1             |

## 2. Figures

## 2.1. Figure S1

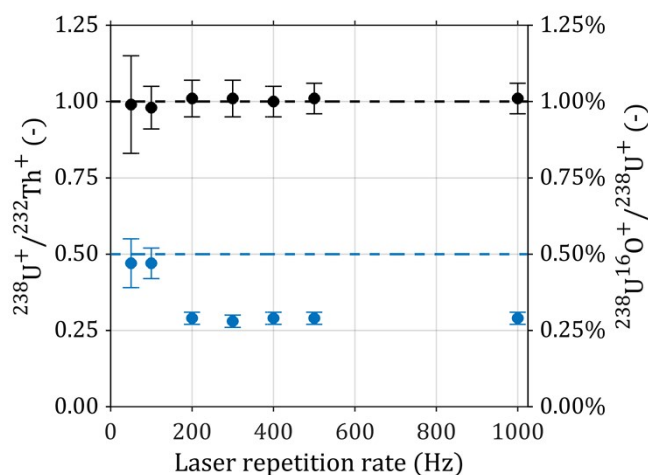**Figure S1.** The average  $^{238}\text{U}^+ / ^{232}\text{Th}^+$  (black circles) and  $^{238}\text{U}^{16}\text{O}^+ / ^{238}\text{U}^+$  ratios (blue circles) with corresponding standard deviations obtained upon ablation of a NIST SRM 610 glass using a square spot size of 5 μm across the full range of laser repetition rates.
